# Supplementary material for: Thermally Induced Transitions of d(G4T4G3) Quadruplexes Can Be Described as Kinetically Driven Processes
Source: MDPI journal article supplement (doi:10.3390/life12060825), 2022-06-01
Supplement: s1 [file s1]

## Supplementary Material

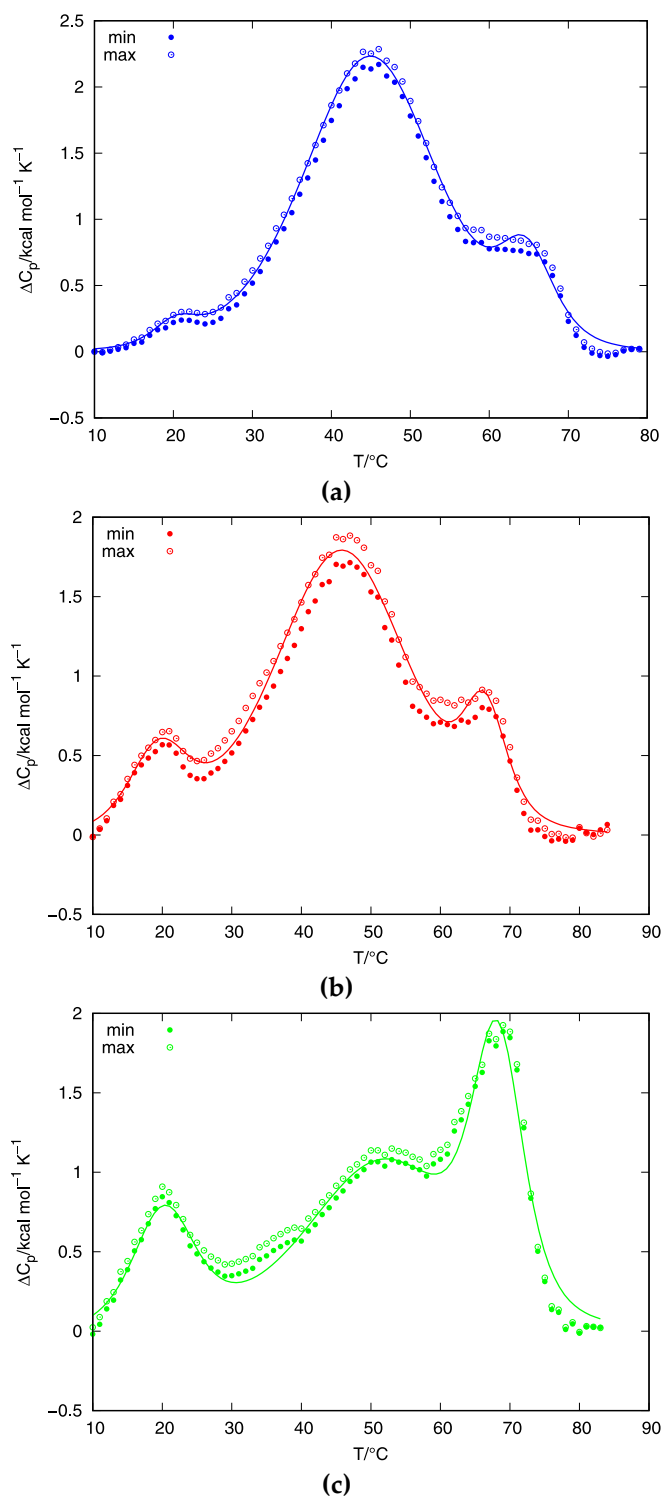

**Figure S1.** In order to estimate experimental error, two baselines were used to subtract DSC data. First baseline yielded largest overall area under thermogram (empty circles) and the second baseline yielded smallest overall area under thermogram (full circles). The  $\Delta c_p$  vs  $T$  curves were measured at the heating rate of 1.0 °C/min for samples prepared at the cooling rate of 0.05 °C/min; (a) in 25 mM K<sup>+</sup> solution (b) in 35 mM K<sup>+</sup> solution; (c) in 50 mM K<sup>+</sup> solution.

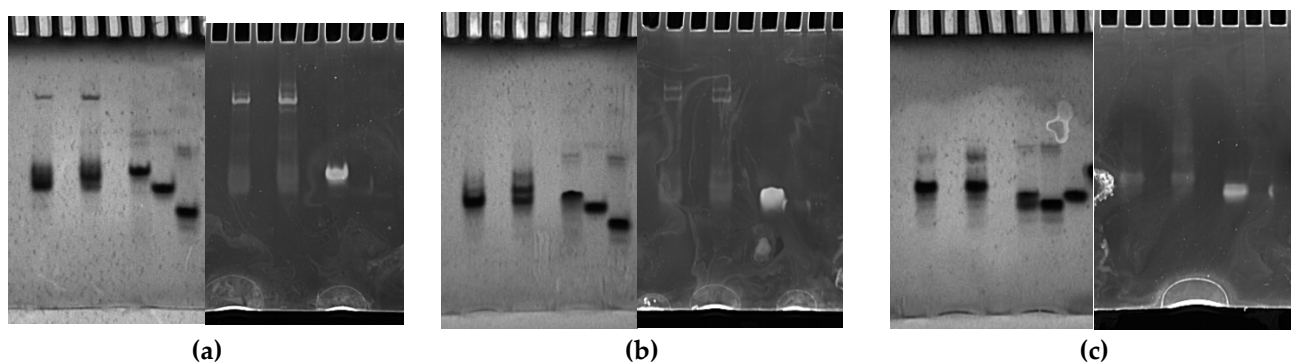

**Figure S2.** Non denaturing PAGE (20 %) of d(G<sub>4</sub>T<sub>4</sub>G<sub>3</sub>) quadruplexes prepared at the cooling rate of either 1.0 °C/min (1<sup>st</sup> lane) or 0.05 °C/min (2<sup>nd</sup> lane) in 50 mM K<sup>+</sup> solution and followed by UV shadowing ( $\lambda=254$  nm) and Fluorescence ( $\lambda=590$  nm): (a) d(G<sub>4</sub>T<sub>4</sub>G<sub>3</sub>) quadruplexes measured at constant temperature of 5 °C; (b) d(G<sub>4</sub>T<sub>4</sub>G<sub>3</sub>) quadruplexes prepared at constant temperature of 20 °C. (c) d(G<sub>4</sub>T<sub>4</sub>G<sub>3</sub>) quadruplexes prepared at constant temperature of 35 °C. As control oligonucleotide double stranded d(5'-AGAAGAAAAGA-3'; 5'-TCTTTTCTTCT-3') (3<sup>rd</sup> lane), single stranded d(5'-TCTTTTCTTCT-3') (4<sup>th</sup> lane) and single stranded d(5'-AGAAGAAAAGA-3') (5<sup>th</sup> lane) markers were used.

|      | A'BS  | A'SB  | A'AS  | A'TS  | A'CS  | A'BA  | A'AB  | A'BT  | A'BC  | EBS   | EAS   | ETS   | ECS   | EBA   | EBT   | ETC   |
|------|-------|-------|-------|-------|-------|-------|-------|-------|-------|-------|-------|-------|-------|-------|-------|-------|
| A'BS | 1.00  | 0.59  | -0.09 | 0.12  | -0.01 | -0.21 | -0.01 | -0.08 | -0.15 | 0.93  | -0.08 | 0.10  | -0.02 | 0.01  | 0.15  | 0.06  |
| A'SB | 0.59  | 1.00  | -0.09 | -0.26 | -0.01 | 0.36  | -0.16 | 0.12  | 0.13  | 0.60  | -0.10 | -0.30 | -0.02 | -0.14 | -0.44 | -0.33 |
| A'AS | -0.09 | -0.09 | 1.00  | 0.13  | -0.03 | 0.08  | 0.21  | -0.06 | -0.04 | -0.08 | 0.99  | 0.16  | 0.00  | 0.15  | 0.05  | 0.01  |
| A'TS | 0.12  | -0.26 | 0.13  | 1.00  | 0.06  | -0.20 | 0.16  | 0.29  | -0.05 | 0.08  | 0.14  | 0.94  | 0.07  | 0.15  | 0.54  | 0.26  |
| A'CS | -0.01 | -0.01 | -0.03 | 0.06  | 1.00  | 0.04  | 0.04  | 0.10  | 0.05  | -0.03 | -0.02 | 0.07  | 0.98  | 0.05  | 0.08  | 0.06  |
| A'BA | -0.21 | 0.36  | 0.08  | -0.20 | 0.04  | 1.00  | 0.63  | 0.15  | 0.13  | -0.30 | 0.08  | -0.21 | 0.05  | 0.65  | -0.38 | -0.32 |
| A'AB | -0.01 | -0.16 | 0.21  | 0.16  | 0.04  | 0.63  | 1.00  | 0.01  | -0.11 | -0.21 | 0.23  | 0.20  | 0.06  | 0.99  | 0.22  | 0.07  |
| A'BT | -0.08 | 0.12  | -0.06 | 0.29  | 0.10  | 0.15  | 0.01  | 1.00  | 0.18  | -0.04 | -0.06 | 0.31  | 0.10  | -0.02 | 0.56  | 0.01  |
| A'BC | -0.15 | 0.13  | -0.04 | -0.05 | 0.05  | 0.13  | -0.11 | 0.18  | 1.00  | -0.15 | -0.03 | -0.05 | 0.02  | -0.11 | -0.10 | 0.71  |
| EBS  | 0.93  | 0.60  | -0.08 | 0.08  | -0.03 | -0.30 | -0.21 | -0.04 | -0.15 | 1.00  | -0.09 | 0.11  | -0.03 | -0.20 | 0.11  | -0.01 |
| EAS  | -0.08 | -0.10 | 0.99  | 0.14  | -0.02 | 0.08  | 0.23  | -0.06 | -0.03 | -0.09 | 1.00  | 0.18  | 0.01  | 0.16  | 0.08  | 0.03  |
| ETS  | 0.10  | -0.30 | 0.16  | 0.94  | 0.07  | -0.21 | 0.20  | 0.31  | -0.05 | 0.11  | 0.18  | 1.00  | 0.07  | 0.19  | 0.63  | 0.29  |
| ECS  | -0.02 | -0.02 | 0.00  | 0.07  | 0.98  | 0.05  | 0.06  | 0.10  | 0.02  | -0.03 | 0.01  | 0.07  | 1.00  | 0.06  | 0.08  | 0.04  |
| EBA  | 0.01  | -0.14 | 0.15  | 0.15  | 0.05  | 0.65  | 0.99  | -0.02 | -0.11 | -0.20 | 0.16  | 0.19  | 0.06  | 1.00  | 0.18  | 0.05  |
| EBT  | 0.15  | -0.44 | 0.05  | 0.54  | 0.08  | -0.38 | 0.22  | 0.56  | -0.10 | 0.11  | 0.08  | 0.63  | 0.08  | 0.18  | 1.00  | 0.41  |
| ETC  | 0.06  | -0.33 | 0.01  | 0.26  | 0.06  | -0.32 | 0.07  | 0.01  | 0.71  | -0.01 | 0.03  | 0.29  | 0.04  | 0.05  | 0.41  | 1.00  |

**Table S1.** Correlation matrix corresponding to the model analysis of the DSC melting and cooling thermograms for concentration K<sup>+</sup> ions equal to 25 mM

**Table S2.** Correlation matrix corresponding to the model analysis of the

|      | A'BS  | A'SB  | A'AS  | A'TS  | A'CS  | A'BA  | A'AB  | A'BT  | A'BC  | EBS   | EAS   | ETS   | ECS   | EBA   | EBT   | EBC   |
|------|-------|-------|-------|-------|-------|-------|-------|-------|-------|-------|-------|-------|-------|-------|-------|-------|
| A'BS | 1.00  | 0.55  | -0.09 | 0.15  | -0.01 | -0.21 | -0.01 | -0.10 | -0.15 | 0.95  | -0.08 | 0.10  | -0.02 | 0.01  | 0.16  | 0.06  |
| A'SB | 0.55  | 1.00  | -0.09 | -0.26 | -0.01 | 0.36  | -0.16 | 0.12  | 0.15  | 0.55  | -0.10 | -0.30 | -0.02 | -0.14 | -0.44 | -0.33 |
| A'AS | -0.09 | -0.09 | 1.00  | 0.13  | -0.03 | 0.08  | 0.21  | -0.06 | -0.04 | -0.08 | 0.99  | 0.16  | 0.00  | 0.15  | 0.05  | 0.01  |
| A'TS | 0.15  | -0.26 | 0.13  | 1.00  | 0.06  | -0.20 | 0.16  | 0.29  | -0.05 | 0.08  | 0.14  | 0.94  | 0.07  | 0.15  | 0.54  | 0.30  |
| A'CS | -0.01 | -0.01 | -0.03 | 0.06  | 1.00  | 0.05  | 0.05  | 0.10  | 0.05  | -0.03 | -0.02 | 0.07  | 0.99  | 0.05  | 0.10  | 0.06  |
| A'BA | -0.21 | 0.36  | 0.08  | -0.20 | 0.05  | 1.00  | 0.63  | 0.15  | 0.13  | -0.30 | 0.10  | -0.21 | 0.05  | 0.65  | -0.40 | -0.32 |
| A'AB | -0.01 | -0.16 | 0.21  | 0.16  | 0.05  | 0.63  | 1.00  | 0.01  | -0.11 | -0.25 | 0.23  | 0.20  | 0.06  | 0.99  | 0.22  | 0.07  |
| A'BT | -0.10 | 0.12  | -0.06 | 0.29  | 0.10  | 0.15  | 0.01  | 1.00  | 0.18  | -0.04 | -0.06 | 0.31  | 0.08  | -0.02 | 0.56  | 0.01  |
| A'BC | -0.15 | 0.15  | -0.04 | -0.05 | 0.05  | 0.13  | -0.11 | 0.18  | 1.00  | -0.15 | -0.03 | -0.05 | 0.02  | -0.11 | -0.10 | 0.75  |
| EBS  | 0.95  | 0.55  | -0.08 | 0.08  | -0.03 | -0.30 | -0.25 | -0.04 | -0.15 | 1.00  | -0.09 | 0.11  | -0.03 | -0.20 | 0.11  | -0.01 |
| EAS  | -0.08 | -0.10 | 0.99  | 0.14  | -0.02 | 0.10  | 0.23  | -0.06 | -0.03 | -0.09 | 1.00  | 0.18  | 0.01  | 0.16  | 0.08  | 0.03  |
| ETS  | 0.10  | -0.30 | 0.16  | 0.94  | 0.07  | -0.21 | 0.20  | 0.31  | -0.05 | 0.11  | 0.18  | 1.00  | 0.07  | 0.19  | 0.63  | 0.29  |
| ECS  | -0.02 | -0.02 | 0.00  | 0.07  | 0.99  | 0.05  | 0.06  | 0.08  | 0.02  | -0.03 | 0.01  | 0.07  | 1.00  | 0.06  | 0.10  | 0.04  |
| EBA  | 0.01  | -0.14 | 0.15  | 0.15  | 0.05  | 0.65  | 0.99  | -0.02 | -0.11 | -0.20 | 0.16  | 0.19  | 0.06  | 1.00  | 0.18  | 0.05  |
| EBT  | 0.16  | -0.44 | 0.05  | 0.54  | 0.10  | -0.40 | 0.22  | 0.56  | -0.10 | 0.11  | 0.08  | 0.63  | 0.10  | 0.18  | 1.00  | 0.45  |
| EBC  | 0.06  | -0.33 | 0.01  | 0.30  | 0.06  | -0.32 | 0.07  | 0.01  | 0.75  | -0.01 | 0.03  | 0.29  | 0.04  | 0.05  | 0.45  | 1.00  |

DSC melting and cooling thermograms for concentration K<sup>+</sup> ions equal to 35 mM.

|      | A'BS  | A'SB  | A'AS  | A'TS  | A'CS  | A'BA  | A'AB  | A'BT  | A'BC  | EBS   | EAS   | ETS   | ECS   | EBA   | EBT   | EBC   |
|------|-------|-------|-------|-------|-------|-------|-------|-------|-------|-------|-------|-------|-------|-------|-------|-------|
| A'BS | 1.00  | 0.55  | -0.09 | 0.15  | -0.01 | -0.21 | -0.01 | -0.10 | -0.20 | 0.95  | -0.05 | 0.10  | -0.02 | -0.01 | 0.16  | 0.06  |
| A'SB | 0.55  | 1.00  | -0.09 | -0.26 | -0.01 | 0.36  | -0.16 | 0.10  | 0.15  | 0.55  | -0.10 | -0.30 | -0.02 | -0.14 | -0.39 | -0.33 |
| A'AS | -0.09 | -0.09 | 1.00  | 0.13  | -0.03 | 0.05  | 0.25  | -0.06 | -0.04 | -0.08 | 0.95  | 0.16  | 0.00  | 0.15  | 0.05  | 0.01  |
| A'TS | 0.15  | -0.26 | 0.13  | 1.00  | 0.06  | -0.20 | 0.16  | 0.29  | -0.05 | 0.08  | 0.14  | 0.94  | 0.07  | 0.15  | 0.51  | 0.30  |
| A'CS | -0.01 | -0.01 | -0.03 | 0.06  | 1.00  | 0.05  | 0.05  | 0.10  | 0.05  | -0.03 | -0.02 | 0.07  | 0.99  | 0.05  | 0.10  | 0.06  |
| A'BA | -0.21 | 0.36  | 0.05  | -0.20 | 0.05  | 1.00  | 0.63  | 0.15  | 0.13  | -0.30 | 0.10  | -0.21 | 0.05  | 0.65  | -0.40 | -0.32 |
| A'AB | -0.01 | -0.16 | 0.25  | 0.16  | 0.05  | 0.63  | 1.00  | 0.01  | -0.11 | -0.25 | 0.25  | 0.20  | 0.06  | 0.99  | 0.22  | 0.07  |
| A'BT | -0.10 | 0.10  | -0.06 | 0.29  | 0.10  | 0.15  | 0.01  | 1.00  | 0.18  | -0.04 | -0.06 | 0.31  | 0.08  | 0.02  | 0.56  | 0.01  |
| A'BC | -0.20 | 0.15  | -0.04 | -0.05 | 0.05  | 0.13  | -0.11 | 0.18  | 1.00  | -0.15 | -0.03 | -0.05 | 0.02  | -0.11 | -0.10 | 0.75  |
| EBS  | 0.95  | 0.55  | -0.08 | 0.08  | -0.03 | -0.30 | -0.25 | -0.04 | -0.15 | 1.00  | -0.09 | 0.14  | -0.03 | -0.20 | 0.11  | 0.01  |
| EAS  | -0.05 | -0.10 | 0.95  | 0.14  | -0.02 | 0.10  | 0.25  | -0.06 | -0.03 | -0.09 | 1.00  | 0.18  | 0.01  | 0.16  | 0.08  | 0.03  |
| ETS  | 0.10  | -0.30 | 0.16  | 0.94  | 0.07  | -0.21 | 0.20  | 0.31  | -0.05 | 0.14  | 0.18  | 1.00  | 0.07  | 0.19  | 0.63  | 0.29  |
| ECS  | -0.02 | -0.02 | 0.00  | 0.07  | 0.99  | 0.05  | 0.06  | 0.08  | 0.02  | -0.03 | 0.01  | 0.07  | 1.00  | 0.06  | 0.10  | 0.05  |
| EBA  | -0.01 | -0.14 | 0.15  | 0.15  | 0.05  | 0.65  | 0.99  | 0.02  | -0.11 | -0.20 | 0.16  | 0.19  | 0.06  | 1.00  | 0.18  | 0.05  |
| EBT  | 0.16  | -0.39 | 0.05  | 0.51  | 0.10  | -0.40 | 0.22  | 0.56  | -0.10 | 0.11  | 0.08  | 0.63  | 0.10  | 0.18  | 1.00  | 0.45  |
| EBC  | 0.06  | -0.33 | 0.01  | 0.30  | 0.06  | -0.32 | 0.07  | 0.01  | 0.75  | 0.01  | 0.03  | 0.29  | 0.05  | 0.05  | 0.45  | 1.00  |

**Table S3.** Correlation matrix corresponding to the model analysis of the DSC melting and cooling thermograms for concentration K<sup>+</sup> ions equal to 50 mM.
